# Supplementary material for: The Presence of Plasmids in Lactococcus lactis IL594 Determines Changes in the Host Phenotype and Expression of Chromosomal Genes
Source: MDPI journal article supplement (doi:10.3390/ijms24010793), 2023-01-02
Supplement: s1 [file s1]

# The presence of plasmids in *Lactococcus lactis* IL594 determines changes in the host phenotype and expression of chromosomal genes

Katarzyna Kosiorek<sup>1</sup>, Anna Koryszewska-Bagińska<sup>2</sup>, Marek Skoneczny<sup>1</sup>, Lidia Stasiak-Różańska<sup>3</sup> and Tamara Aleksandrak-Piekarczyk<sup>1,\*</sup>

<sup>1</sup> Institute of Biochemistry and Biosciences, Pawinskiego 5a, 02-106 Warsaw, Poland

<sup>2</sup> Department of Medical Biology, Medical University of Warsaw, Litewska 14/16, 00-575 Warsaw, Poland

<sup>3</sup> Department of Food Technology and Assessment, Institute of Food Sciences, Warsaw University of Life Sciences-SGGW, Nowoursynowska 159C St., 02-787 Warsaw, Poland

\* Correspondence: tamara@ibb.waw.pl; +48 592 12 13

## Supplementary Materials

**Table S1.** Strains and primers used in this study.

| Strain or primer pair | Genotypic characteristics                                     | Source and reference |
|-----------------------|---------------------------------------------------------------|----------------------|
| <i>L. lactis</i>      |                                                               |                      |
| IL594                 | wild-type strain harbouring seven plasmids pIL1-pIL7          | INRA [31]            |
| IL1403                | plasmid-free strain, derivative of IL594                      |                      |
| Primers <sup>a</sup>  |                                                               |                      |
| LIPurMaF / LIPurMaR   | <u>ATTGCGTAGCCATGTGCGTC/CTGTTTCTCCACCAATCAGCG</u>             | This study           |
| LITufaF / LITufaR     | <u>CGTGACCTCTTGAGCGAATACG/GAGTGGTTTGTCACTGTTCGCG</u>          |                      |
| p1orf3zF / p1orf3zR   | <u>CTTGCTGACGAATTAGGAGTTAG/TCAGCGGTTAATAGCTTCATAC</u>         |                      |
| p1orf6zF / p1orf6zR   | <u>CCTTGTTCTGTTGGATTGATTAG/AGAACTCGCTTCTAAATTTGTG</u>         |                      |
| p2citRzF / p2citRzR   | <u>AGGAGACAACAACATGAAAGTC/GAGCGTTTGTCTCCAATCTG</u>            |                      |
| p2orf2zF / p2orf2zR   | <u>AGCTAAACAGACCGTTCAATAC/GTTTAGGACGATCGAACCAC</u>            |                      |
| p3orf2tF / p3orf2tR   | <u>CAACAACAGAACGAAACACAAC/AAGTTCTGTTCTAAGAATACTGACG</u>       |                      |
| p3orf3zF / p3orf3zR   | <u>TCTCAGGTGTTTATCTGGTATTTC/GACAACAAGTCCTACTCCAAAG</u>        |                      |
| p4or24zF / p4or24zR   | <u>GTTTGATCTTACCTTGCTGTTG/GTTACTGGGAACCGATTACG</u>            |                      |
| p4or49zF / p4or49zR   | <u>CCTTACCAATGGTGATGTAATCG/GTCAAAGATACTGGCGGTTTAG</u>         |                      |
| p5cadAzF / p5cadAzR   | <u>GCATCGACGGTTGGTATTG/GTTTGGCGGCTAAGTCTAAC</u>               |                      |
| p5cadCzF / p5cadCzR   | <u>GTTGATAGTCACAAGGATGGTAAG/AATTTACGCCAAGCTCCATAAG</u>        |                      |
| p6orf6zF / p6orf6zR   | <u>TCAGGGAATTCTTTATTAGGTTCTG/CTTGTTTCATCTACCTTAGTCAAGTATC</u> |                      |
| p6orf7zF / p6orf7zR   | <u>GATATACTGCGACTTCCAGTTG/ATTCTAATGCCACATGGTAAGG</u>          |                      |
| p7or11zF / p7or11zR   | <u>ATCGAACCGCCAATCAAG/CCGTATTGATCCCAGAAGTAAG</u>              |                      |
| p7orfXzF / p7orfXzR   | <u>TGCAGATGAGTTGAGTGTTAC/TGCTACCACCTTCTACTTTACC</u>           |                      |

INRA - French National Institute for Agricultural Research

<sup>a</sup>primers were designed on the basis of the *L. lactis* IL594 plasmid nucleotide sequences (NCBI accession no. HM021326, HM021327, HM021328, HM021329, HM021330, HM021331, and HM197723;

<http://www.ncbi.nlm.nih.gov>)

**Figure S1.** Time points of samples collection during growth of *L. lactis* IL594 (---) and IL1403 (•••) in M17 supplemented with different carbon sources. Identified time points of bacterial growth phases: early exponential (E), mid-exponential (M), transition (T), and stationary (S) are presented in circles.

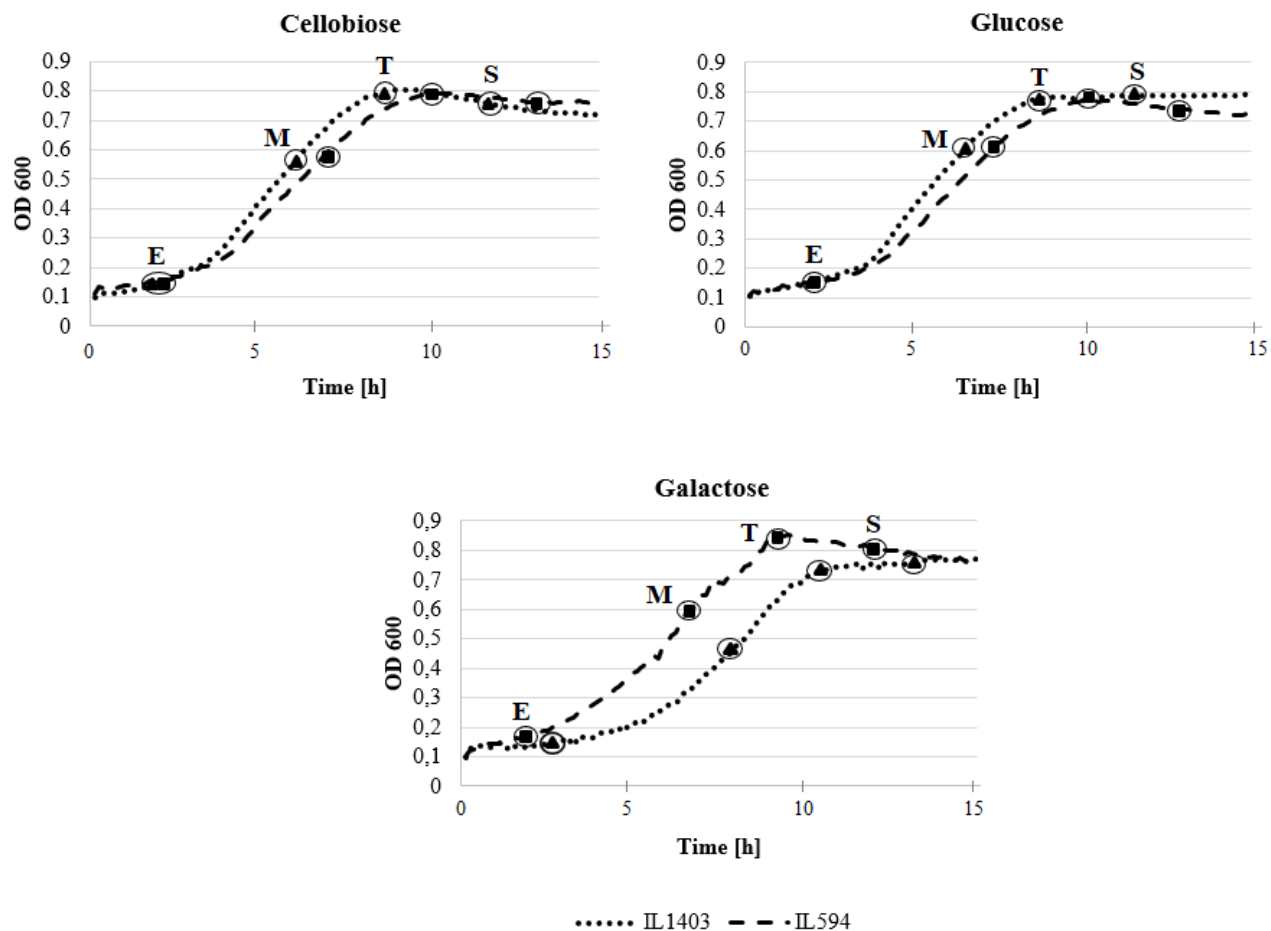

**Figure S2.** Venn diagram of differentially expressed genes in *L. lactis* IL594 in comparison to IL1403 induced by presence of different carbon sources (glucose- “Glu”; cellobiose- “Cel”; galactose- “Gal”). The numbers of genes in the intersection sets are indicated. E refers to the early exponential phase of growth, M - mid-exponential growth phase, T - transition phase and S - stationary phase of growth. Overlapping regions show the number of common genes with an altered expression profile at different growth phases. Numbers in non-overlapping areas of each oval show the number of genes expressed differently only in selected phase of growth unique to each strain. The number of genes expressed commonly in all growth phases included 7 (0.3%), 8 (0.3%), and 2 (0.08%) genes during growth of the strain on glucose, cellobiose, and galactose, respectively. The number of genes expressed differently in all growth phases included 49 (2%), 146 (6%), and 140 (5%) genes during growth of the strain on glucose, cellobiose, and galactose, respectively. The numbers in brackets represents the percentages of all genes annotated in IL1403 genome.

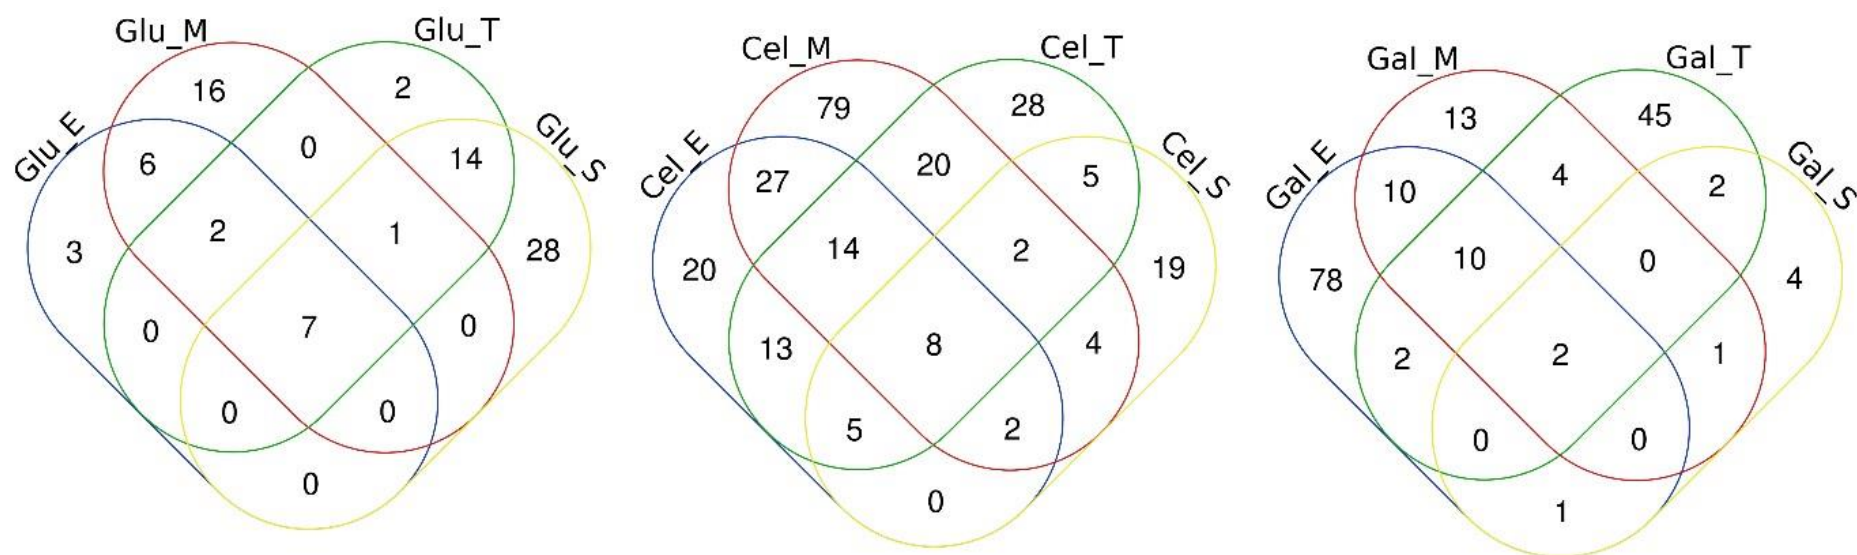

**Table S2 .** Differentially expressed genes in *L. lactis* IL594. A gene was considered to be upregulated between compared *L. lactis* samples if the level of its transcript was elevated by at least 4-fold ( $\text{Log}_2\text{Ratio} \geq 2.0$ ) and downregulated when the level of its transcript was decreased by at least 4-fold ( $\text{Log}_2\text{Ratio} \leq -2.0$ ). The transcription change was recognized as valid when the probability of such a random difference was less than 0.05 ( $p < 0.05$ ).

| Gene                                                              | NCBI       | COGs | Upregulation or downregulation on a sugar source |     |     |     |            |      |      |      |           |      |     |     | Protein function                                                  |
|-------------------------------------------------------------------|------------|------|--------------------------------------------------|-----|-----|-----|------------|------|------|------|-----------|------|-----|-----|-------------------------------------------------------------------|
|                                                                   | GeneID     |      | Glucose                                          |     |     |     | Cellobiose |      |      |      | Galactose |      |     |     |                                                                   |
|                                                                   |            |      | E                                                | M   | T   | S   | E          | M    | T    | S    | E         | M    | T   | S   |                                                                   |
| <b>Energy production and conversion</b>                           |            |      |                                                  |     |     |     |            |      |      |      |           |      |     |     |                                                                   |
| <i>atpC</i>                                                       | SPS12515.1 | C    |                                                  | 2.6 |     |     |            | 2.8  |      |      |           | 2.4  |     |     | F0F1 ATP synthase subunit epsilon                                 |
| <i>atpD</i>                                                       | SPS12514.1 | C    |                                                  |     |     |     | 2.3        |      | 2.5  |      |           |      |     | 3.5 | F0F1 ATP synthase subunit beta                                    |
| <i>citB</i>                                                       | AAK04769.1 | C    |                                                  |     |     | 2.9 | 5.5        | 6.3  | 7.5  | 3.8  | 7.8       | 8.1  | 6.0 |     | aconitate hydratase                                               |
| <i>ldhB</i>                                                       | AAK04474.1 | C    |                                                  |     |     |     | 2.4        | 3.0  |      |      |           |      |     |     | L-lactate dehydrogenase                                           |
| <i>mleS</i>                                                       | AAK04998.1 | C    |                                                  |     | 2.1 |     |            |      |      | 2.9  |           |      | 2.3 | 2.1 | malate dehydrogenase malic enzyme                                 |
| <i>noxD</i>                                                       | GEB09238.1 | C    |                                                  |     |     |     |            | -4.1 | -2.0 |      | -3.6      | -4.2 |     |     | NADH oxidase                                                      |
| <i>ybiE</i>                                                       | GFO78088.1 | C    | 2.3                                              |     |     |     |            | 3.3  |      |      |           | 2.2  |     |     | oxidoreductase                                                    |
| <i>ycdG</i>                                                       | AAK04334.1 | C    |                                                  |     |     |     |            |      |      |      | 2.2       | 4.9  |     |     | oxidoreductase                                                    |
| <i>yddB</i>                                                       | AAK04431.1 | C    |                                                  |     |     | 2.2 |            |      |      |      |           |      |     |     | oxidoreductase                                                    |
| <i>yfhC</i>                                                       | AAK04676.1 | C    |                                                  |     |     | 2.0 |            |      |      |      | 2.1       |      |     |     | hypothetical protein                                              |
| <i>yfiJ</i>                                                       | AAK04695.1 | C    | -2.0                                             |     |     |     |            |      | -2.5 | -2.1 | -2.3      |      |     |     | NADPH-flavin oxidoreductase                                       |
| <i>yiaD</i>                                                       | AAK04894.1 | C    |                                                  |     |     |     |            | -2.5 | -2.0 |      |           |      |     |     | NADH-flavin reductase                                             |
| <i>ypjF</i>                                                       | AAK05652.1 | C    |                                                  |     |     |     |            | 2.7  |      |      |           |      |     |     | oxidoreductase                                                    |
| <i>yrjB</i>                                                       | AAK05831.1 | C    |                                                  | 2.1 |     |     |            |      | -2.3 |      |           |      |     |     | oxidoreductase                                                    |
| <b>Cell cycle control, cell division, chromosome partitioning</b> |            |      |                                                  |     |     |     |            |      |      |      |           |      |     |     |                                                                   |
| <i>ftsE</i>                                                       | SPS11645.1 | D    |                                                  |     |     |     | -2.2       | -2.2 |      |      |           | 2.3  |     |     | cell-division ATP-binding protein                                 |
| <i>ftsW2</i>                                                      | AAK04982.1 | D    |                                                  |     |     | 2.5 |            |      |      |      |           |      | 3.1 |     | hypothetical protein                                              |
| <i>gidA</i>                                                       | AAK05945.1 | D    |                                                  |     |     |     |            | -2.3 |      |      |           |      |     |     | tRNA uridine 5-carboxymethylaminomethyl modification protein GidA |
| <b>Amino acid transport and metabolism</b>                        |            |      |                                                  |     |     |     |            |      |      |      |           |      |     |     |                                                                   |

|              |                |   |     |     |     |     |     |     |     |     |     |     |     |     |      |                                  |                                                  |                                       |                                                   |                                               |  |                                      |                  |
|--------------|----------------|---|-----|-----|-----|-----|-----|-----|-----|-----|-----|-----|-----|-----|------|----------------------------------|--------------------------------------------------|---------------------------------------|---------------------------------------------------|-----------------------------------------------|--|--------------------------------------|------------------|
| <i>arcA</i>  | WP_004254504.1 | E |     |     |     |     |     |     |     |     |     |     |     |     | -2.9 |                                  |                                                  |                                       | arginine deiminase                                |                                               |  |                                      |                  |
| <i>arcC2</i> | AAK06131.1     | E |     |     |     |     |     |     |     |     |     |     |     |     | -2.7 |                                  |                                                  |                                       | carbamate kinase                                  |                                               |  |                                      |                  |
| <i>aroD</i>  | SPS10137.1     | E |     |     |     |     |     |     |     |     |     |     |     |     | -2.3 |                                  |                                                  |                                       | 3-dehydroquinate dehydratase                      |                                               |  |                                      |                  |
| <i>asnH</i>  | AAK06326.1     | E |     |     |     |     |     |     |     |     |     |     |     |     | 2.6  | 2.0                              |                                                  |                                       |                                                   | asparagine synthetase                         |  |                                      |                  |
| <i>cysD</i>  | AAK04171.1     | E |     |     |     |     |     |     |     |     |     |     |     |     | 2.5  |                                  |                                                  |                                       | O-acetylhomoserine sulfhydrylase                  |                                               |  |                                      |                  |
| <i>cysK</i>  | QOK50869.1     | E |     |     |     |     |     |     |     |     |     |     |     |     | -3.5 | 4.2                              | -2.3                                             |                                       |                                                   | cysteine synthase serine family               |  |                                      |                  |
| <i>glnB</i>  | AAK05689.1     | E | 3.0 |     |     | 2.5 | 3.1 |     |     | 2.4 |     |     |     |     |      | nitrogen regulatory protein P-II |                                                  |                                       |                                                   |                                               |  |                                      |                  |
| <i>glnQ</i>  | SPS12229.1     | E |     |     |     |     |     |     |     |     |     |     |     |     | -2.4 | -2.4                             |                                                  |                                       |                                                   | glutamine ABC transporter ATP-binding protein |  |                                      |                  |
| <i>gltB</i>  | SPS11857.1     | E |     |     |     |     |     |     |     |     |     |     |     |     | 2.3  |                                  |                                                  |                                       | glutamate synthase large subunit glutamate family |                                               |  |                                      |                  |
| <i>hisK</i>  | GEB08549.1     | E |     |     |     |     |     |     |     |     |     |     |     |     | 2.4  |                                  |                                                  |                                       | histidinol phosphatase histidine family           |                                               |  |                                      |                  |
| <i>homD</i>  | CAA65713.1     | E |     |     |     |     |     |     |     |     |     |     |     |     | 3.7  | 2.2                              |                                                  |                                       | homoserine dehydrogenase                          |                                               |  |                                      |                  |
| <i>ilvD</i>  | SPS12837.1     | E |     |     |     |     |     |     |     |     |     |     |     |     | 2.2  | 2.2                              |                                                  |                                       |                                                   | dihydroxy-acid dehydratase                    |  |                                      |                  |
| <i>ilvH</i>  | SPS12840.1     | E |     |     |     |     |     |     |     |     |     |     |     |     | 2.0  | -2.1                             |                                                  |                                       |                                                   | acetolactate synthase 3 regulatory subunit    |  |                                      |                  |
| <i>oppB</i>  | QQF01347.1     | E | 6.0 | 6.7 | 6.3 | 6.1 | 6.4 | 6.8 | 8.1 | 3.0 | 7.0 | 6.7 | 5.4 | 0.8 |      |                                  | oligopeptide ABC transporter permease            |                                       |                                                   |                                               |  |                                      |                  |
| <i>oppC</i>  | QQF01348.1     | E | 6.2 | 6.8 | 6.7 | 4.9 | 3.2 | 5.4 | 4.9 |     |     | 5.9 | 5.6 | 2.7 | 2.3  |                                  |                                                  | oligopeptide ABC transporter permease |                                                   |                                               |  |                                      |                  |
| <i>oppD</i>  | QQF01345.1     | E | 4.2 | 4.9 | 3.3 |     |     | 3.2 | 5.4 | 4.9 |     |     | 5.9 | 5.6 | 2.7  | 2.2                              |                                                  |                                       | oligopeptide ABC transporter ATP binding protein  |                                               |  |                                      |                  |
| <i>oppF</i>  | QQE99754.1     | E | 5.0 | 6.0 | 5.0 | 4.0 | 4.4 | 6.7 | 6.4 | 2.3 | 6.2 | 6.2 | 3.4 |     |      |                                  | oligopeptide ABC transporter ATP binding protein |                                       |                                                   |                                               |  |                                      |                  |
| <i>optA</i>  | GEB08281.1     | E |     |     |     |     |     |     |     |     |     |     |     |     | -3.1 |                                  |                                                  |                                       | oligopeptide ABC transporter                      |                                               |  |                                      |                  |
| <i>optB</i>  | GEB08280.1     | E |     |     |     |     |     |     |     |     |     |     |     |     | -2.6 | -2.3                             |                                                  |                                       |                                                   | oligopeptide ABC transporter permease         |  |                                      |                  |
| <i>pepD</i>  | AAK04350.1     | E |     |     |     |     |     |     |     |     |     |     |     |     | 2.8  | 4.5                              |                                                  |                                       |                                                   | dipeptidase                                   |  |                                      |                  |
| <i>pepF</i>  | CAA83534.1     | E |     |     |     |     |     |     |     |     |     |     |     |     | 2.7  | 2.1                              |                                                  |                                       |                                                   | oligoendopeptidase F                          |  |                                      |                  |
| <i>pepO</i>  | QOK51376.1     | E |     |     |     |     |     |     |     |     |     |     |     |     | -3.9 | -3.9                             | -2.8                                             | -3.3                                  | -2.5                                              |                                               |  | neutral endopeptidase                |                  |
| <i>pepP</i>  | AAK04789.1     | E |     |     |     |     |     |     |     |     |     |     |     |     | -2.9 | -3.0                             |                                                  |                                       |                                                   | -2.1                                          |  |                                      | aminopeptidase P |
| <i>trpC</i>  | TRW54532.1     | E |     |     |     |     |     |     |     |     |     |     |     |     | -2.0 |                                  |                                                  |                                       |                                                   |                                               |  | Indole-3-glycerol phosphate synthase |                  |
| <i>ydgB</i>  | AAK04453.1     | E |     |     |     |     |     |     |     |     |     |     |     |     | 2.8  |                                  |                                                  |                                       |                                                   |                                               |  | L-asparagine uniporter               |                  |

|                                              |            |   |     |      |      |                                                                   |
|----------------------------------------------|------------|---|-----|------|------|-------------------------------------------------------------------|
| <i>yeyJ</i>                                  | AAK04598.1 | E |     |      | 2.0  | hypothetical protein                                              |
| <i>yfcG</i>                                  | AAK04637.1 | E |     |      | 3.2  | oligopeptide ABC transporter ATP binding protein                  |
| <i>ygaJ</i>                                  | AE005176.1 | E |     | -2.2 |      | putative peptidase                                                |
| <i>yhbF</i>                                  | AAK04808.1 | E |     | -2.4 |      | hypothetical protein                                              |
| <i>yibG</i>                                  | AAK04907.1 | E |     | 2.6  |      | L-asparagine uniporter                                            |
| <i>yrfD</i>                                  | AAK05797.1 | E | 2.7 | 4.0  |      | amino acid antiporter                                             |
| <i>yshA</i>                                  | AAK05907.1 | E |     | 2.5  |      | glutamate antiporter                                              |
| <b>Nucleotide transport and metabolism</b>   |            |   |     |      |      |                                                                   |
| <i>add</i>                                   | AAK04385.1 | F |     | 2.2  | 2.0  | adenosine deaminase                                               |
| <i>dukA</i>                                  | GEB08937.1 | F |     |      | 2.4  | deoxynucleoside kinase nucleotide and nucleoside interconversions |
| <i>pfs</i>                                   | AAK05978.1 | F |     | 2.0  |      | 5'-methylthioadenosine/S-adenosylhomocysteine nucleosidase        |
| <i>xpt</i>                                   | AAK05244.1 | F | 2.9 |      |      | xanthine phosphoribosyltransferase                                |
| <i>yccE</i>                                  | AAK04320.1 | F |     |      | -2.1 | hypothetical protein   NUDIX hydrolase                            |
| <i>yeyD</i>                                  | AAK04591.1 | F |     |      | -3.4 | hypothetical protein   nucleoside 2-deoxyribosyltransferase       |
| <i>yfcD</i>                                  | AAK04634.1 | F |     | 2.7  |      | hypothetical protein                                              |
| <i>ygbG</i>                                  | AAK04728.1 | F |     | 2.8  |      | ribonuclease Z                                                    |
| <i>ygiJ</i>                                  | AAK04786.1 | F |     | 2.5  | -2.1 | hypothetical protein   adenylate kinase                           |
| <i>ypdB</i>                                  |            | F | 2.0 |      | 2.3  | ribonuclease                                                      |
| <i>ypdD</i>                                  |            | F | 2.1 |      | 2.1  | ribonuclease                                                      |
| <b>Carbohydrate transport and metabolism</b> |            |   |     |      |      |                                                                   |
| <i>bglH</i>                                  | AAK05557.1 | G | 2.0 |      |      | beta-glucosidase                                                  |
| <i>deoB</i>                                  | AE005176.1 | G |     | -2.4 |      | phosphopentomutase                                                |
| <i>dexC</i>                                  | GFO79576.1 | G |     |      | 2.5  | neopullulanase degradation of polysaccharides                     |

|             |                |   |      |      |      |      |      |      |      |      |      |      |      |      |  |                                                                 |
|-------------|----------------|---|------|------|------|------|------|------|------|------|------|------|------|------|--|-----------------------------------------------------------------|
| <i>fruA</i> | AAK05057.1     | G | 2.3  |      |      |      |      |      |      |      |      |      |      |      |  | PTS system fructose-specific transporter subunit IIBC           |
| <i>galE</i> | WP_058218180.1 | G |      |      |      |      |      | 2.2  |      |      |      |      |      |      |  | UDP-glucose 4-epimerase                                         |
| <i>glmM</i> | SPS12287.1     | G |      |      |      |      |      | -2.0 |      |      |      |      |      |      |  | phosphoglucosamine mutase                                       |
| <i>gntK</i> | QNL92507.1     | G |      |      |      |      |      | 3.1  | 5.3  | 2.9  | 5.8  | 4.8  | 3.6  |      |  | gluconate kinase energy metabolism, sugars                      |
| <i>malE</i> | AAK05781.1     | G | -6.1 | -5.8 | -5.1 | -3.1 | -6.7 | -6.3 | -4.9 | -2.0 |      | -2.7 | -3.0 | -3.3 |  | maltose ABC transporter substrate binding protein               |
| <i>malF</i> | AAK05782.1     | G | -6.5 | -5.7 | -5.4 | -2.4 | -6.5 | -5.9 | -3.8 |      |      |      |      | -2.0 |  | maltose ABC transporter permease                                |
| <i>malG</i> | AAK05783.1     | G | -4.7 | -5.3 | -4.3 | -2.2 | -6.0 | -5.6 | -2.5 |      |      |      |      |      |  | maltose ABC transporter permease                                |
| <i>pgmB</i> | SPS12282.1     | G | -3.2 | -2.8 |      |      | -2.3 | -2.0 | -2.5 |      |      |      |      |      |  | beta-phosphoglucomutase                                         |
| <i>rbsD</i> | SPS10141.1     | G |      |      | -2.3 | -2.1 |      |      |      | -2.4 |      |      | -2.6 | -2.1 |  | D-ribose pyranase cytoplasmic mutarotase                        |
| <i>rbsK</i> | SPS10140.1     | G |      |      | -2.5 | 2.0  |      |      |      | -2.2 |      |      | -2.0 | -2.1 |  | ribokinase                                                      |
| <i>xylB</i> | QQE99348.1     | G |      |      |      |      | 2.5  | 2.9  |      |      | 2.7  |      |      |      |  | xylulose kinase                                                 |
| <i>xylT</i> | AAK05601.1     | G | 2.2  |      |      |      |      |      |      |      |      |      |      |      |  | D-xylose proton-symporter                                       |
| <i>xynD</i> | AAK04381.1     | G |      |      |      |      | 2.5  |      | 2.3  | 2.1  |      |      | 2.8  |      |  | endo-1,4-beta-xylanase D                                        |
| <i>xynT</i> | AAK05604.1     | G |      |      |      | 2.3  |      |      |      |      |      |      |      |      |  | xyloside transporter                                            |
| <i>yedF</i> | AAK04525.1     | G | 2.5  |      |      |      | 2.0  | 2.0  |      |      | 2.0  | 2.0  |      |      |  | PTS system beta-glucoside-specific transporter; PTS system      |
| <i>yeeA</i> | AAK04526.1     | G | -2.8 |      |      |      |      |      |      |      |      |      |      |      |  | hypothetical protein   glycoside (trehalose, maltose) hydrolase |
| <i>yeeB</i> | AAK04528.1     | G |      |      |      | -2.1 | -2.3 |      | -3.1 |      |      |      |      |      |  | sugar hydrolase                                                 |
| <i>yhgE</i> | AAK04856.1     | G |      |      | 2.4  | 3.8  |      |      |      |      |      |      |      |      |  | hypothetical protein                                            |
| <i>yjbC</i> | AAK04990.1     | G |      |      |      |      |      |      |      |      | -3.8 |      |      |      |  | hypothetical protein   hexose phosphatase                       |
| <i>yngG</i> | AAK05428.1     | G |      |      |      |      |      |      |      | 2.2  |      |      |      |      |  | sugar ABC transporter permease transport and binding protein    |

|                                          |            |   |     |      |     |      |     |     |                                                                             |
|------------------------------------------|------------|---|-----|------|-----|------|-----|-----|-----------------------------------------------------------------------------|
| <i>ypdA</i>                              | AAK05595.1 | G | 3.2 | 2.3  | 2.4 | 2.0  | 2.4 | 2.7 | sugar ABC transporter substrate binding protein                             |
| <i>yqhA</i>                              | AAK05727.1 | G | 2.1 | -2.4 |     |      |     |     | hypothetical protein   aldose-1-epimerase                                   |
| <i>yrgI</i>                              | AAK05812.1 | G | 2.7 | -2.3 |     |      |     |     | hypothetical protein   phosphoglycerate mutase                              |
| <b>Coenzyme transport and metabolism</b> |            |   |     |      |     |      |     |     |                                                                             |
| <i>dfpA</i>                              | GEB08447.1 | H |     |      |     | -2.2 |     |     | phosphopantothenoylcysteine decarboxylase                                   |
| <i>menB</i>                              | SPS12340.1 | H | 3.4 |      |     |      |     |     | naphthoate synthase                                                         |
| <i>menD</i>                              | SPS12342.1 | H |     |      |     | 2.2  |     |     | 2-oxoglutarate decarboxylase<br>menaquinone and ubiquinone                  |
| <i>nadD</i>                              | GFO78988.1 | H |     |      |     |      | 2.4 |     | nicotinic acid mononucleotide<br>adenylyltransferase                        |
| <i>pyrZ</i>                              | AAK05445.1 | H |     |      | 2.5 |      | 2.2 |     | dihydroorotate dehydrogenase electron<br>transfer subunit                   |
| <i>ribA</i>                              | GFO78927.1 | H |     | 2.0  |     |      |     |     | 3,4-dihydroxy-2-butanone 4-phosphate<br>synthase                            |
| <i>yccH</i>                              | AAK04324.1 | H |     | 2.2  |     |      | 2.5 |     | 5'nucleosyl;-tetraphosphatase                                               |
| <i>ychG</i>                              | AAK04378.1 | H |     |      |     | -2.2 |     |     | hypothetical protein  <br>Protoporphyrinogen oxidase                        |
| <i>yjhB</i>                              | AAK05043.1 | H |     | 3.0  |     |      |     |     | hypothetical protein   1,4-dihydroxy-2-<br>naphthoate octaprenyltransferase |
| <i>yuhD</i>                              | AAK06091.1 | H |     | 2.2  |     |      |     |     | hypothetical protein  methyltransferases                                    |
| <b>Lipid transport and metabolism</b>    |            |   |     |      |     |      |     |     |                                                                             |
| <i>accD</i>                              | SPS12911.1 | I |     | -2.4 |     |      |     |     | acetyl-CoA carboxylase subunit beta                                         |
| <i>fabZ1</i>                             | AAK04663.1 | I |     | -2.9 |     |      |     |     | (3R)-hydroxymyristoyl-ACP dehydratase                                       |
| <i>mvaA</i>                              | PLW59014.2 | I |     | -3.0 |     | -3.3 |     |     | hydroxymethylglutaryl-CoA reductase                                         |
| <i>ydhD</i>                              | AAK04467.1 | I | 3.5 | 3.8  |     | 2.8  |     |     | hypothetical protein                                                        |
| <i>yebA</i>                              | AAK04504.1 | I |     |      |     | -2.8 |     |     | mevalonate kinase                                                           |



|                                                 |            |   |      |      |      |      |      |      |                                 |                                                 |
|-------------------------------------------------|------------|---|------|------|------|------|------|------|---------------------------------|-------------------------------------------------|
| <i>yriF</i>                                     | AAK05835.1 | I | 2.6  |      |      |      |      |      |                                 | hypothetical protein                            |
| Translation, ribosomal structure and biogenesis |            |   |      |      |      |      |      |      |                                 |                                                 |
| <i>def</i>                                      | SPS11935.1 | J | -4.2 |      |      |      |      |      |                                 | peptide deformylase                             |
| <i>infB</i>                                     | SPS12378.1 | J | 2.4  |      |      |      |      |      |                                 | translation initiation factor IF-2              |
| <i>infC</i>                                     | SPS12498.1 | J | -2.3 |      |      | -4.1 |      |      |                                 | translation initiation factor IF-3              |
| <i>lysS</i>                                     | SPS12107.1 | J | -5.4 |      |      |      |      |      |                                 | lysyl-tRNA synthetase class II                  |
| <i>mnmA</i>                                     | SPS12635.1 | J | -2.0 |      |      |      |      |      |                                 | tRNA-specific 2-thiouridylase MnmA              |
| <i>rnpA</i>                                     | SPS12578.1 | J | 2.6  | 2.8  | 2.2  | 2.2  |      |      |                                 | ribonuclease P                                  |
| <i>rplC</i>                                     | SPS12433.1 | J | -2.0 |      |      |      |      |      |                                 | 50S ribosomal protein L3                        |
| <i>rplD</i>                                     | SPS12434.1 | J | -2.1 |      |      | -2.2 |      |      |                                 | 50S ribosomal protein L4                        |
| <i>rplT</i>                                     | SPS12500.1 | J | 2.2  |      |      |      |      |      |                                 | 50S ribosomal protein L20                       |
| <i>rpmE2</i>                                    | SPS12051.1 | J | 2.9  | 5.0  | 2.2  | 6.5  | 5.1  | 3.3  | 50S ribosomal protein L31 RpmE2 |                                                 |
| <i>rpmI</i>                                     | SPS12499.1 | J | 2.2  |      |      |      |      |      |                                 | 50S ribosomal protein L35 ribosomal proteins    |
| <i>rpsF</i>                                     | SPS10925.1 | J | 2.3  |      |      |      |      |      |                                 | 30S ribosomal protein S6                        |
| <i>rpsG</i>                                     | SPS10759.1 | J | -2.6 |      |      |      |      |      |                                 | 30S ribosomal protein S7                        |
| <i>rpsN2</i>                                    | AAK04986.1 | J | -2.2 |      |      |      |      |      |                                 | 30S ribosomal protein S14                       |
| <i>rpsT</i>                                     | AAK05837.1 | J | 2.0  |      |      |      |      |      |                                 | 30S ribosomal protein S20                       |
| <i>serS</i>                                     | SPS12712.1 | J | -6.1 | -5.8 | -5.1 | -3.1 | -6.7 | -6.3 | -3.9                            | seryl-tRNA synthetase                           |
| <i>ybgE</i>                                     | GFO78072.1 | J | 2.4  |      |      |      |      |      |                                 | amidase                                         |
| <i>yhdC</i>                                     | AAK04831.1 | J | 2.3  |      |      |      |      |      |                                 | acetyl transferase                              |
| <i>ylaG</i>                                     | AAK05199.1 | J | -4.3 |      |      |      |      |      |                                 | hypothetical protein                            |
| <i>ymdC</i>                                     | AAK05309.1 | J | 2.1  |      |      |      |      |      |                                 | kanamycin kinase                                |
| <i>ynjI</i>                                     | AAK05309.1 | J | 2.5  |      |      |      |      |      |                                 | hypothetical protein                            |
| <i>yqfF</i>                                     | AAK05713.1 | J | 2.1  |      |      |      |      |      |                                 | spermidine acetyltransferase                    |
| <i>yyaL</i>                                     | AAK04104.1 | J | 2.3  |      |      |      |      |      |                                 | GTP-dependent nucleic acid-binding protein EngD |
| Transcription                                   |            |   |      |      |      |      |      |      |                                 |                                                 |



|                                       |                |   |           |      |                      |                                     |     |                                                    |                       |                       |
|---------------------------------------|----------------|---|-----------|------|----------------------|-------------------------------------|-----|----------------------------------------------------|-----------------------|-----------------------|
| yveF                                  | AAK06157.1     | K | 2.2       | 2.3  | 2.8                  | -2.1                                | 2.5 | hypothetical protein                               |                       |                       |
| Replication, recombination and repair |                |   |           |      |                      |                                     |     |                                                    |                       |                       |
| dnaB                                  | SPS12362.1     | L | 2.5       |      |                      |                                     |     | hypothetical protein                               |                       |                       |
| dnaI                                  | WP_060416476.1 | L | -3.4      | -4.9 | -3.4 -3.7 -2.2       |                                     |     | primosomal protein DnaI                            |                       |                       |
| dnaN                                  | PS10614.1      | L | -3.2      |      |                      |                                     |     | DNA polymerase III subunit beta                    |                       |                       |
| dnaQ                                  | AAK05080.1     | L | -2.1      |      |                      |                                     |     | DNA polymerase III subunit epsilon                 |                       |                       |
| mutM                                  | SPS12735.1     | L | 2.6       | 2.8  | -2.2                 | formamidopyrimidine-DNA glycosylase |     |                                                    |                       |                       |
| ogt                                   | PLW60489.1     | L | 2.0 -3.5  |      |                      |                                     |     | 6-O-methylguanine DNA methyltransferase            |                       |                       |
| polC                                  | AAK06222.1     | L | 2.4       |      |                      |                                     |     | DNA polymerase III PolC                            |                       |                       |
| recJ                                  | SPS10369.1     | L | -2.1 -2.1 |      |                      |                                     |     | ssDNA-specific exonuclease RecJ                    |                       |                       |
| recO                                  | SPS12671.1     | L | 2.6       |      |                      |                                     |     | DNA repair protein RecO                            |                       |                       |
| sbcC                                  | AAK05419.1     | L | 2.0       |      |                      |                                     |     | ATP-dependent dsDNA exonuclease degradation of DNA |                       |                       |
| scpA                                  | AE005176.1     | L | -2.4      |      |                      |                                     |     | segregation and condensation protein A             |                       |                       |
| tag                                   | AAK05220.1     | L | -2.5 2.4  |      |                      |                                     |     | DNA-3-methyladenine glycosidase                    |                       |                       |
| tra1077C                              | AAK04470.1     | L | 6.4       | 6.8  | 8.1                  | 3.0                                 | 7.0 | 6.7                                                | 5.4                   | IS1077C transposase   |
| tra1077D                              | AAK04737.1     | L | -2.1      |      |                      |                                     |     | IS1077D transposase                                |                       |                       |
| tra1077E                              | AAK04922.1     | L | -3.0      |      |                      |                                     |     | IS1077E transposase                                |                       |                       |
| tra904A                               | AAK04151.1     | L | 3.8       | 5.3  | 3.4                  |                                     |     |                                                    | transposase of IS904A |                       |
| tra904B                               | AAK04235.1     | L | 3.7       | 4.8  | 2.2                  |                                     |     |                                                    | transposase of IS904B |                       |
| tra904D                               | AAK04468.1     | L | 3.8       | 4.9  | 3.0                  | 3.1                                 |     |                                                    | 2.4                   | transposase of IS904D |
| tra904E                               | AAK04735.1     | L | 3.5       | 4.2  | 2.2                  |                                     |     |                                                    | transposase of IS904E |                       |
| tra983A                               | AAK04779.1     | L | -3.6      |      |                      |                                     |     | transposase of IS983A                              |                       |                       |
| trpB                                  | SPS11791.1     | L | 3.0       |      |                      |                                     |     | tryptophan synthase subunit beta                   |                       |                       |
| xseA                                  | GEB09426.1     | L | 5.0       |      |                      |                                     |     | exodeoxyribonuclease VII large subunit             |                       |                       |
| yafG                                  | AAK04149.1     | L | 2.0       | 2.2  | 3.2                  | hypothetical protein                |     |                                                    |                       |                       |
| yafI                                  | AAK04152.1     | L | 3.5       | 3.9  | hypothetical protein |                                     |     |                                                    |                       |                       |

|                                                              |                |   |     |      |      |      |      |      |      |                                                                       |                               |
|--------------------------------------------------------------|----------------|---|-----|------|------|------|------|------|------|-----------------------------------------------------------------------|-------------------------------|
| <i>ybdK</i>                                                  | AAK04234.1     | L | 2.0 | 3.5  | 2.7  |      |      | 2.7  | 2.0  | hypothetical protein transposon related function                      |                               |
| <i>ygcE</i>                                                  | AAK04738.1     | L |     |      |      | 2.9  | 4.4  |      |      | hypothetical protein                                                  |                               |
| <i>yidF</i>                                                  | AAK04921.1     | L |     | 3.6  | 3.9  |      |      |      | 2.1  | hypothetical protein                                                  |                               |
| <i>ysiD</i>                                                  | AAK05915.1     | L |     |      |      | 2.7  | -2.2 |      |      | hypothetical protein                                                  |                               |
| <i>ytfB</i>                                                  | AAK05980.1     | L |     |      |      | 2.9  |      |      |      | hypothetical protein                                                  |                               |
| Cell wall/membrane/envelope biogenesis                       |                |   |     |      |      |      |      |      |      |                                                                       |                               |
| <i>dacB</i>                                                  | AAK05048.1     | M |     |      |      | 2.9  |      |      |      | D-alanyl-D-alanine carboxypeptidase murein sacculus and peptidoglycan |                               |
| <i>dapA</i>                                                  | SPS10159.1     | M |     |      | 2.3  |      | 2.4  | 2.3  | 2.9  | dihydrodipicolinate synthase                                          |                               |
| <i>ftsQ</i>                                                  | AAK05686.1     | M |     |      |      |      |      |      | 2.1  | hypothetical protein                                                  |                               |
| <i>glmS</i>                                                  | WP_058223713.1 | M | 2.0 |      |      |      |      |      |      | glucosamine--fructose-6-phosphate aminotransferase                    |                               |
| <i>murB</i>                                                  | SPS10276.1     | M |     |      |      | 2.5  |      |      |      | UDP-N-acetylenolpyruvoylglucosamine reductase                         |                               |
| <i>pbp2A</i>                                                 | AIS04644.1     | M |     |      |      | 2.9  |      |      |      | penicillin-binding protein 2a                                         |                               |
| <i>plpB</i>                                                  | AAK04417.1     | M |     |      |      |      |      | 2.2  |      | outer membrane lipoprotein                                            |                               |
| <i>rgpE</i>                                                  | AAK04304.1     | M |     |      |      | 2.8  | -2.2 |      |      | glycosyltransferase                                                   |                               |
| <i>ycbF</i>                                                  | AAK04311.1     | M |     |      |      | 2.5  |      |      |      | LPS biosynthesis protein                                              |                               |
| <i>ycbG</i>                                                  | AAK04312.1     | M |     |      |      | 2.1  |      |      |      | LPS biosynthesis protein                                              |                               |
| <i>yibC</i>                                                  | AAK04903.1     | M |     |      |      |      |      | -3.9 |      | hypothetical protein                                                  |                               |
| Cell motility                                                |                |   |     |      |      |      |      |      |      |                                                                       |                               |
| <i>acmA</i>                                                  | AAK04370.1     | N |     |      |      | 2.22 | -2   |      |      | autolysin cell wall hydrolase                                         |                               |
| Posttranslational modification, protein turnover, chaperones |                |   |     |      |      |      |      |      |      |                                                                       |                               |
| <i>ahpC</i>                                                  | SPS12269.1     | O |     |      |      | -2.5 | -2.2 | 3.2  |      | alkyl hydroperoxide reductase                                         |                               |
| <i>gcp</i>                                                   | SBW29465.1     | O |     |      |      |      |      | -4.7 |      | DNA-binding/iron metalloprotein/AP endonuclease                       |                               |
| <i>osmC</i>                                                  | PLW60135.1     | O |     | -6.5 | -5.7 | -5.4 | -2.4 | -6.5 | -5.9 | -4.9                                                                  | osmotically inducible protein |

|                                                              |                |   |      |      |     |      |      |      |                                          |                                              |                                                               |
|--------------------------------------------------------------|----------------|---|------|------|-----|------|------|------|------------------------------------------|----------------------------------------------|---------------------------------------------------------------|
| <i>pflA</i>                                                  | QOK49714.1     | O |      |      | 2.8 | -2.0 |      |      | pyruvate-formate lyase activating enzyme |                                              |                                                               |
| <i>trxB2</i>                                                 | AAK05745.1     | O |      | -2.2 | 2.2 |      |      | -3.4 | thioredoxin reductase                    |                                              |                                                               |
| <i>ydiE</i>                                                  | AAK04480.1     | O |      |      | 2.5 | 3.6  | -2.4 | 2.6  | hypothetical protein                     |                                              |                                                               |
| Inorganic ion transport and metabolism                       |                |   |      |      |     |      |      |      |                                          |                                              |                                                               |
| <i>amtB</i>                                                  | AAK05690.1     | P |      | 4.1  |     |      |      |      | ammonium transporter                     |                                              |                                                               |
| <i>cbiO</i>                                                  | SBW29503.1     | P | 2.2  |      |     | 5.8  |      | 2.2  | 3.8                                      | cobalt importer protein; ATP-binding subunit |                                                               |
| <i>dpsA</i>                                                  | GFO79963.1     | P |      | -2.0 |     |      |      |      |                                          | non-heme iron-binding ferritin               |                                                               |
| <i>fhuB</i>                                                  | PLW60363.1     | P |      |      |     |      |      |      | -2.1                                     | ferrichrome ABC importer permease            |                                                               |
| <i>mtsA</i>                                                  | AAK05414.1     | P | -2.7 | -3.4 |     |      |      |      |                                          | manganese ABC importer                       |                                                               |
| <i>mtsB</i>                                                  | AAK05416.1     | P | -2.2 | -3.2 |     |      |      |      |                                          | manganese ABC importer                       |                                                               |
| <i>mtsC</i>                                                  | AAK05415.1     | P | -2.9 | -4.3 |     |      | -2.3 |      |                                          | manganese ABC importer permease              |                                                               |
| <i>pacL</i>                                                  | AAK04776.1     | P |      |      |     |      |      |      | 2.3                                      | magnesium-transporting ATPase                |                                                               |
| <i>yafB</i>                                                  | AAK04148.1     | P |      |      |     | 2.1  | 3.0  |      |                                          | sulfate permease, MFS superfamily            |                                                               |
| <i>ydaE</i>                                                  | AAK04406.1     | P |      |      |     |      |      |      | 2.3                                      | Co/Zn/Cd efflux system component             |                                                               |
| <i>yigC</i>                                                  | AAK04943.1     | P |      |      |     |      | 2.5  |      |                                          | arsenate reductase                           |                                                               |
| <i>yoaB</i>                                                  | SPS12037.1     | P |      |      |     |      | 2.7  |      |                                          | magnesium-transporting ATPase                |                                                               |
| <i>yogJ</i>                                                  | AAK05544.1     | P |      |      |     |      | 2.2  |      |                                          | Fe/Co/Zn/Cd efflux system component          |                                                               |
| <i>yuhE</i>                                                  | AAK06092.1     | P |      |      |     |      | 2.6  |      |                                          | copper homeostasis protein                   |                                                               |
| <i>yuiA</i>                                                  | AAK06092.1     | P |      |      |     |      | 2.6  |      |                                          | heavy metal-transporting ATPase              |                                                               |
| <i>zitQ</i>                                                  | AAK06212.1     | P |      |      |     |      | 3.1  | -2.3 |                                          | zinc ABC importer ATP binding protein        |                                                               |
| Secondary metabolites biosynthesis, transport and catabolism |                |   |      |      |     |      |      |      |                                          |                                              |                                                               |
| <i>dltA</i>                                                  | WP_058205708.1 | Q |      |      |     | -2.9 |      | -3.0 |                                          | -2.0                                         | D-alanine--poly(phosphoribitol) ligase subunit 1              |
| <i>dltC</i>                                                  | QQE99144.1     | Q |      |      |     | -2.1 |      | -3.6 |                                          |                                              | D-alanine--poly(phosphoribitol) ligase subunit 2              |
| <i>fabF</i>                                                  | SPS12386.1     | Q |      | -2.3 |     |      |      |      |                                          |                                              | 3-oxoacyl-ACP synthase fatty acid and phospholipid metabolism |

|                                    |            |   |      |     |     |      |      |      |      |                          |
|------------------------------------|------------|---|------|-----|-----|------|------|------|------|--------------------------|
| <i>fabG</i>                        | QNL91178.1 | Q | -2.3 |     |     |      |      |      |      | 3-ketoacyl-ACP reductase |
| <i>ykaF</i>                        | AAK05079.1 | Q |      |     |     |      |      | -2.4 | -2.3 | hypothetical protein     |
| <b>General function prediction</b> |            |   |      |     |     |      |      |      |      |                          |
| <i>comEC</i>                       | AAK05870.1 | R |      |     |     |      |      |      | 2.7  | hypothetical protein     |
| <i>engA</i>                        | KWT47845.1 | R |      |     |     |      | 2.8  |      |      | GTP-binding protein EngA |
| <i>yagB</i>                        | AIS02642.1 | R |      |     |     |      | 2.1  |      |      | hypothetical protein     |
| <i>ybhD</i>                        | AAK04270.1 | R |      |     |     | -2.2 | -2.3 |      |      | hypothetical protein     |
| <i>yceE</i>                        | AAK04342.1 | R |      |     |     |      |      |      | 4.0  | hypothetical protein     |
| <i>ycfF</i>                        | SBW29425.1 | R |      |     |     |      |      | -3.5 | -2.3 | hypothetical protein     |
| <i>ydhB</i>                        | AAK04465.1 | R |      |     |     |      |      | -2.7 |      | hypothetical protein     |
| <i>yeaA</i>                        | AAK04493.1 | R |      |     |     |      |      |      | -3.0 | hypothetical protein     |
| <i>yfgH</i>                        | AAK04668.1 | R |      |     |     |      | 2.8  |      |      | hypothetical protein     |
| <i>yheB</i>                        | AAK04833.1 | R |      |     |     |      |      |      | 2.4  | hypothetical protein     |
| <i>yhhD</i>                        | AAK04860.1 | R |      |     |     | 2.5  |      |      |      | hypothetical protein     |
| <i>yihF</i>                        | AAK04954.1 | R |      |     |     |      |      | -2.3 |      | hypothetical protein     |
| <i>ykiF</i>                        | AAK05173.1 | R |      |     |     |      |      | 2.6  |      | hypothetical protein     |
| <i>ymdE</i>                        | AAK05315.1 | R |      |     |     |      |      | -3.2 |      | hypothetical protein     |
| <i>yqeL</i>                        | AAK04319.1 | R |      |     |     | -2.2 |      |      | 4.6  | GTP-binding protein YqeH |
| <i>yqfE</i>                        | AAK05712.1 | R |      |     |     |      | 2.5  |      |      | hypothetical protein     |
| <i>yqgA</i>                        | AAK05716.1 | R |      |     |     |      | 2.4  |      |      | hypothetical protein     |
| <i>yrjE</i>                        | AAK05834.1 | R |      |     |     |      | 2.6  |      |      | transport permease       |
| <i>ysbA</i>                        | AAK05851.1 | R | 2.1  | 2.3 | 2.9 | 2.7  |      |      |      | hypothetical protein     |
| <i>yseA</i>                        | AAK05879.1 | R |      |     |     |      |      | -2.6 |      | hypothetical protein     |
| <i>ytaB</i>                        | AAK05932.1 | R |      |     |     |      | 2.2  | 2.9  |      | hypothetical protein     |
| <i>ythC</i>                        | AAK06004.1 | R |      |     |     |      | 2.9  |      |      | hypothetical protein     |
| <i>ywfD</i>                        | AAK06275.1 | R |      |     |     |      |      | 2.6  |      | hypothetical protein     |
| <i>yxfC</i>                        | AAK06364.1 | R |      |     |     |      | 2.2  |      |      | hypothetical protein     |
| <b>Function unknown</b>            |            |   |      |     |     |      |      |      |      |                          |

|         |            |   |   |      |      |      |      |      |      |                                                            |      |                      |                      |     |                                            |
|---------|------------|---|---|------|------|------|------|------|------|------------------------------------------------------------|------|----------------------|----------------------|-----|--------------------------------------------|
| L200001 |            |   | S | -4.1 |      | -2.2 |      | -2.6 |      | hypothetical protein similar to prophage bIL312 protein 12 |      |                      |                      |     |                                            |
| L200003 |            |   | S | 2.5  |      | 3.5  |      |      |      | hypothetical protein                                       |      |                      |                      |     |                                            |
| L200005 |            |   | S | 2.5  |      | 2.2  |      |      |      | hypothetical protein                                       |      |                      |                      |     |                                            |
| L200032 |            |   | S |      |      |      |      | 2.3  |      | hypothetical protein                                       |      |                      |                      |     |                                            |
| L200034 |            |   | S |      |      | 2.8  |      |      |      | hypothetical protein                                       |      |                      |                      |     |                                            |
| L200039 |            |   | S |      |      |      |      | -2.7 |      | hypothetical protein similar to bacteriophage bIL285       |      |                      |                      |     |                                            |
| L200065 |            |   | S | 2.4  |      | 2.7  |      | -2.2 |      | 2.1                                                        |      | hypothetical protein |                      |     |                                            |
| L200074 |            |   | S | 2.9  |      | 2.4  |      | 2.0  |      | 2.5                                                        |      | -2.3                 | -2.4                 | 2.1 | hypothetical protein                       |
| L200078 |            |   | S |      |      | 2.1  |      | 2.7  |      | 4.5                                                        |      | 4.4                  |                      | 3.7 | sodium:solute symporter, former pseudogene |
| yacI    | AAK04112.1 | S |   |      | 2.3  |      |      |      |      |                                                            |      |                      | hypothetical protein |     |                                            |
| yaiG    | AAK04182.1 | S |   |      | 2.7  |      | 3.2  |      | -2.2 |                                                            | 2.0  |                      | hypothetical protein |     |                                            |
| yaiJ    | BAL52160.1 | S |   |      | 3.3  |      |      |      |      |                                                            | -3.2 |                      | hypothetical protein |     |                                            |
| ybaC    | AAK04199.1 | S |   |      | -3.8 |      | 2.6  |      | 6.1  |                                                            | -2.4 |                      | hypothetical protein |     |                                            |
| ybbB    | SBW29265.1 | S |   |      |      |      | -2.2 |      | -2.6 |                                                            | -4.3 |                      | -2.3                 |     | hypothetical protein                       |
| ybcG    | AAK04218.1 | S |   |      | 2.6  |      |      |      |      |                                                            |      |                      | hypothetical protein |     |                                            |
| ybfA    | AAK04251.1 | S |   |      |      |      |      |      |      |                                                            | 3.1  |                      | hypothetical protein |     |                                            |
| ybgB    | GFO78053.1 | S |   |      | 2.6  |      |      |      |      |                                                            |      |                      | hypothetical protein |     |                                            |
| ybjD    | AAK04293.1 | S |   |      | 2.6  |      | 2.5  |      |      |                                                            |      |                      | hypothetical protein |     |                                            |
| ycbA    | AAK04306.1 | S |   |      |      |      |      |      | -2.2 |                                                            |      |                      | hypothetical protein |     |                                            |
| ycdB    | AAU43207.1 | S |   |      |      |      |      |      | -2.1 |                                                            |      |                      | hypothetical protein |     |                                            |
| ycjG    | AAK04395.1 | S |   |      | 2.6  |      |      |      |      |                                                            |      |                      | hypothetical protein |     |                                            |
| ydbD    | AAK04412.1 | S |   |      | 2.0  |      |      |      | 2.2  |                                                            |      |                      | hypothetical protein |     |                                            |
| yedA    | AAK04521.1 | S |   |      | 2.8  |      |      |      |      |                                                            |      |                      | hypothetical protein |     |                                            |
| yfdG    | AAK04648.1 | S |   |      | 2.1  |      |      |      |      |                                                            |      |                      | hypothetical protein |     |                                            |
| yfhH    | AAK04680.1 | S |   |      | -3.6 |      |      |      | -2.3 |                                                            |      |                      | hypothetical protein |     |                                            |

|             |            |   |      |      |      |     |     |      |      |      |  |  |                                             |
|-------------|------------|---|------|------|------|-----|-----|------|------|------|--|--|---------------------------------------------|
| <i>yfiH</i> | AAK04692.1 | S |      | 2.2  |      |     |     |      |      |      |  |  | hypothetical protein                        |
| <i>yfiI</i> | AAK04694.1 | S |      | 3.0  | -2.1 |     |     |      |      |      |  |  | hypothetical protein                        |
| <i>ygaD</i> | AAK04713.1 | S |      | -2.4 |      |     |     |      |      |      |  |  | hypothetical protein                        |
| <i>ygfE</i> | AAK04761.1 | S |      |      |      |     |     |      | -2.4 |      |  |  | magnesium importer and exporter             |
| <i>yghD</i> | AAK04774.1 | S |      |      |      |     |     |      | 2.3  |      |  |  | hypothetical protein                        |
| <i>yhbH</i> | AAK04810.1 | S |      |      |      |     |     |      | -4.0 |      |  |  | hypothetical protein                        |
| <i>yhhE</i> | AAK04861.1 | S |      | 2.8  |      |     |     |      |      |      |  |  | hypothetical protein                        |
| <i>yhjA</i> | AAK04881.1 | S | -2.2 |      |      |     |     |      | -2.7 |      |  |  | hypothetical protein                        |
| <i>yibD</i> | AAK04904.1 | S |      |      |      |     |     |      | 2.2  |      |  |  | hypothetical protein                        |
| <i>yiiF</i> | AAK04961.1 | S |      |      |      |     |     |      | 3.6  |      |  |  | transporter                                 |
| <i>yjaE</i> | AAK04980.1 | S | 3.2  |      |      |     |     |      |      |      |  |  | hypothetical protein transmembrane protein  |
| <i>yjhA</i> | AK05042.1  | S |      |      |      |     |     |      | -2.7 |      |  |  | hypothetical protein                        |
| <i>yjjA</i> | AAK05061.1 | S |      |      |      |     |     |      | -3.3 |      |  |  | hypothetical protein                        |
| <i>ykbC</i> | AAK05084.1 | S |      | 2.7  | 4.3  |     |     |      |      |      |  |  | hypothetical protein                        |
| <i>ylfI</i> | AAK05242.1 | S |      |      |      |     |     |      | 2.5  |      |  |  | hypothetical protein                        |
| <i>ylgB</i> | AAK05246.1 | S |      |      |      |     |     |      | -2.2 | 2.1  |  |  | hypothetical protein                        |
| <i>yliD</i> | AAK05268.1 | S | 2.1  | 3.7  |      |     |     | -2.1 |      |      |  |  | hypothetical protein                        |
| <i>ymeA</i> | AAK05317.1 | S |      | 3.5  |      |     |     |      |      | 3.1  |  |  | hypothetical protein                        |
| <i>ymhC</i> | AAK05348.1 | S |      | 3.1  | -2.5 |     |     |      |      |      |  |  | hypothetical protein                        |
| <i>ynbD</i> | AAK05394.1 | S |      |      |      |     |     |      | -2.4 |      |  |  | hypothetical protein                        |
| <i>ynjH</i> | AAK05458.1 | S |      | 4.4  | 6.7  | 6.4 | 2.3 | 6.2  | 6.2  | 3.4  |  |  | hypothetical protein                        |
| <i>yogI</i> | AAK05543.1 | S | -2.3 |      |      |     |     |      |      |      |  |  | phosphate-starvation-inducible protein PsiE |
| <i>ypgH</i> | AAK05624.1 | S |      | -5.3 |      |     |     |      |      | -3.3 |  |  | hypothetical protein                        |
| <i>yphH</i> | AAK05632.1 | S |      |      |      |     |     | 2.7  |      |      |  |  | hypothetical protein                        |
| <i>yphK</i> | AAK05635.1 | S |      | -2.3 |      |     |     |      | -2.8 |      |  |  | hypothetical protein                        |
| <i>ypiH</i> | AAK05645.1 | S |      |      |      |     |     |      | 2.1  |      |  |  | hypothetical protein                        |



|                                                                      |            |   |     |     |     |      |      |      |      |      |      |                                                |
|----------------------------------------------------------------------|------------|---|-----|-----|-----|------|------|------|------|------|------|------------------------------------------------|
| <i>yqeA</i>                                                          | AAK05695.1 | S |     |     |     | -3.7 |      | 2.0  |      |      | -2.3 | hypothetical protein                           |
| <i>yraD</i>                                                          | AAK05753.1 | S |     |     |     | 2.8  | 4.4  |      |      |      |      | hypothetical protein                           |
| <i>yraF</i>                                                          | AAK05756.1 | S |     |     |     |      |      |      |      | -2.1 |      | hypothetical protein                           |
| <i>yrbB</i>                                                          | AAK05760.1 | S |     |     |     |      |      | -2.3 | -2.2 | -2.1 |      | hypothetical protein                           |
| <i>yrbH</i>                                                          | AAK05766.1 | S |     |     |     |      | -2.6 |      | 3.2  |      |      | hypothetical protein                           |
| <i>yreD</i>                                                          | AAK05787.1 | S | 3.3 | 3.8 | 4.9 | 3.8  |      |      |      |      |      | hypothetical protein                           |
| <i>yrgE</i>                                                          | AAK05807.1 | S |     |     |     |      |      |      |      | 2.4  |      | hypothetical protein                           |
| <i>yriB</i>                                                          | AAK05827.1 | S |     |     |     | 2.1  |      | 2.4  |      |      | 2.9  | hypothetical protein                           |
| <i>ysbB</i>                                                          | AAK05852.1 | S |     |     |     |      | 2.8  |      |      |      |      | hypothetical protein                           |
| <i>ysbC</i>                                                          | AAK05853.1 | S |     |     | 2.0 | 2.1  |      |      |      |      |      | hypothetical protein                           |
| <i>yseD</i>                                                          | AAK05883.1 | S |     |     |     | 2.7  | 3.0  | -2.2 |      | 2.4  |      | hypothetical protein                           |
| <i>yshB</i>                                                          | AAK05909.1 | S |     |     |     |      | 2.7  | -2.1 |      |      |      | hypothetical protein                           |
| <i>ysjF</i>                                                          | AAK05925.1 | S |     |     |     |      | 3.0  | -2.2 |      |      |      | hypothetical protein                           |
| <i>ytcA</i>                                                          | AAK05950.1 | S |     |     |     |      |      | -2.6 | -2.2 |      |      | hypothetical protein                           |
| <i>yuaB</i>                                                          | AAK06021.1 | S |     |     |     | 2.3  |      |      |      |      | 3.0  | hypothetical protein                           |
| <i>yuiE</i>                                                          | AAK06109.1 | S |     |     |     |      |      |      |      |      | 2.6  | hypothetical protein                           |
| <i>yujG</i>                                                          | AAK06119.1 | S |     |     |     |      |      |      |      |      | 4.4  | hypothetical protein                           |
| <i>yvcA</i>                                                          | AAK06139.1 | S |     |     |     | 2.2  | 2.3  |      |      |      |      | hypothetical protein                           |
| <i>yveG</i>                                                          | AAK06158.1 | S |     |     |     | 2.1  |      |      |      |      |      | hypothetical protein                           |
| <i>yviA</i>                                                          | AAK06207.1 | S |     |     |     | -3.8 |      |      | -2.2 |      | -2.5 | hypothetical protein                           |
| <i>yxcE</i>                                                          | AAK06341.1 | S |     |     |     |      | 2.3  |      |      |      |      | hypothetical protein                           |
| <b>Signal transduction mechanisms</b>                                |            |   |     |     |     |      |      |      |      |      |      |                                                |
| <i>ytaD</i>                                                          | AAK05934.1 | T |     |     |     | 2.3  |      |      |      | 2.8  | 2.1  | tyrosine phosphatase translation               |
| <i>ythA</i>                                                          | AAK06002.1 | T |     |     |     | 2.3  |      |      |      |      |      | hypothetical protein                           |
| <i>ythB</i>                                                          | AAK06003.1 | T |     |     |     | 2.7  | -2.1 | -3.0 |      | 4.1  | -2.2 | hypothetical protein                           |
| <b>Intracellular trafficking, secretion, and vesicular transport</b> |            |   |     |     |     |      |      |      |      |      |      |                                                |
| <i>clpP</i>                                                          | AIS03218.1 | U |     |     |     |      |      |      |      |      | -2.8 | ATP-dependent Clp protease proteolytic subunit |

|                                 |                 |   |      |      |      |                                                          |                            |
|---------------------------------|-----------------|---|------|------|------|----------------------------------------------------------|----------------------------|
| <i>comGA</i>                    | AAK06221.1      | U | 2.7  | 3.0  | -2.1 | protein ComGA competence protein                         |                            |
| <i>sipL</i>                     | GFO80241.1      | U | 2.5  |      |      | signal peptidase I                                       |                            |
| Defence mechanisms              |                 |   |      |      |      |                                                          |                            |
| <i>blt</i>                      | AAK04221.1      | V | 2.2  |      |      | multidrug efflux transporter multidrug resistance        |                            |
| <i>hsdS</i>                     | AAK57812.1      | V | -3.0 | -2.6 | -2.1 | type I restriction enzyme specificity protein            |                            |
| <i>lmrA</i>                     | QQF01231.1      | V | 2.6  |      |      | multidrug resistance ABC transporter ATP-binding protein |                            |
| <i>lmrP</i>                     | QQF00039.1      | V | 2.4  |      |      | multidrug efflux MFS transporter                         |                            |
| <i>napC</i>                     | GFO78231.1      | V | 3.6  |      |      | multidrug-efflux transporter multidrug resistance        |                            |
| <i>ycfC</i>                     | AAK04353.1      | V | 3.0  |      |      | ABC transporter permease                                 |                            |
| <i>ydaG</i>                     | AAK04408.1      | V | 2.3  |      |      | multidrug resistance ABC transporter ATP-binding protein |                            |
| <i>ypbC</i>                     | AAK05582.1      | V | 3.3  | 3.1  |      | MATE family efflux transporter                           |                            |
| <i>ypgD</i>                     | AAK05620.1      | V | -3.4 | -2.8 | -2.2 | multidrug resistance ABC transporter ATP-binding protein |                            |
| <i>yvhA</i>                     | AAK06200.1      | V | 2.2  |      |      | MATE family efflux transporter                           |                            |
| <i>ywiG</i>                     | AAK06301.1      | V | 2.1  | 2.0  |      | ABC-type multidrug transport system, ATPase component    |                            |
| Mobilome:prophages, transposons |                 |   |      |      |      |                                                          |                            |
| <i>bIL30901</i>                 |                 | X | -2.3 |      |      | integrase prophage bIL309 protein 01                     |                            |
| <i>bIL30909</i>                 |                 | X | 2.8  |      |      | prophage bIL309 protein 09                               |                            |
| <i>bIL30911</i>                 |                 | X | 3.2  |      |      | recombinase prophage bIL309 protein 11                   |                            |
| <i>bIL30913</i>                 | GCF_000842505.1 | X | -2.1 |      |      | replisome organizer prophage bIL309 protein 13           |                            |
| <i>bIL30914</i>                 |                 | X | 2.3  |      |      | DNA replication protein prophage bIL309 protein 14       |                            |
| <i>bIL30922</i>                 |                 | X | 2.5  | 2.2  | 2.3  | 2.8                                                      | prophage bIL309 protein 22 |

|                 |                 |   |  |      |      |      |         |           |                                                                |
|-----------------|-----------------|---|--|------|------|------|---------|-----------|----------------------------------------------------------------|
| <u>bIL30923</u> |                 | X |  |      | -2.1 | -2.1 |         |           | prophage bIL309 protein 23                                     |
| <u>bIL30928</u> |                 | X |  | -5.4 | -2.5 |      | 2.2     | 6.7 -3.4  | prophage bIL309 protein 28                                     |
| <u>bIL30929</u> |                 | X |  | 3.0  |      |      |         |           | prophage bIL309 protein 29                                     |
| <u>bIL30932</u> |                 | X |  | 2.3  | 3.3  |      | 2.4     |           | prophage bIL309 protein 32                                     |
| <u>bIL30936</u> |                 | X |  | -2.3 | -3.9 | -2.2 |         | -3.7 -3.5 | prohead protease prophage bIL309 protein 36                    |
| <u>bIL30938</u> |                 | X |  |      |      |      | 2.2     |           | prophage bIL309 protein 38                                     |
| <u>bIL30942</u> |                 | X |  |      | -2.2 | -2.1 |         |           | small major structural protein prophage bIL309 protein 42      |
| <u>bIL30943</u> |                 | X |  |      | 2.3  |      |         |           | prophage bIL309 protein 43                                     |
| <u>bIL30945</u> |                 | X |  |      |      |      | -2.1    |           | choline ABC transporter permease and substrate binding protein |
| <u>bIL30949</u> |                 | X |  |      |      |      | 2.1     |           | muramidase prophage bIL309 protein 49                          |
| <u>choS</u>     | AAK04946.1      | X |  |      |      |      | -2.1    |           | prophage bIL309 protein 45 tail component                      |
| <u>pi206</u>    |                 | X |  |      | 3.0  |      |         |           | prophage bIL285 protein 06                                     |
| <u>pi215</u>    |                 | X |  |      | 2.0  |      |         |           | prophage bIL285 protein 15                                     |
| <u>pi240</u>    |                 | X |  |      | -3.0 | -2.1 |         | -2.0      | prophage bIL285 protein 40                                     |
| <u>pi301</u>    |                 | X |  |      |      |      |         | 2.2       | prophage bIL286 protein 01                                     |
| <u>pi308</u>    |                 | X |  |      | 2.6  | 4.0  |         |           | prophage bIL286 protein 08                                     |
| <u>pi319</u>    | GCF_000845385.1 | X |  |      |      | 2.2  |         |           | prophage bIL286 protein 19 tail component                      |
| <u>pi325</u>    |                 | X |  |      | 2.5  |      | -3.2    |           | head-tail joining protein prophage bIL286 protein 25           |
| <u>pi333</u>    |                 | X |  |      | 2.7  | 2.8  | -2.4    | 2.4       | prophage bIL286 protein 33                                     |
| <u>pi336</u>    |                 | X |  |      |      |      |         | 2.0       | prophage bIL286 protein 36                                     |
| <u>pi338</u>    |                 | X |  |      |      | 2.0  | -2.2    |           | prophage bIL286 protein 38                                     |
| <u>pi339</u>    |                 | X |  |      | 2.8  |      | 2.5 2.4 |           | 2.9 prophage bIL286 protein 39                                 |
| <u>pi341</u>    |                 | X |  |      |      |      |         | 2.4       | prophage bIL286 protein 41                                     |

|              |   |     |     |      |      |      |      |                                                                              |
|--------------|---|-----|-----|------|------|------|------|------------------------------------------------------------------------------|
| <u>pi346</u> | X |     |     |      | 2.9  | -2.3 |      | DNA replication protein prophage bIL286 protein 46                           |
| <u>pi348</u> | X |     |     |      |      |      | 2.3  | single strand binding helix destabilising protein prophage bIL286 protein 48 |
| <u>pi349</u> | X |     |     |      |      | 3.8  |      | prophage bIL286 protein 49                                                   |
| <u>pi360</u> | X |     |     |      |      | 2.8  |      | integrase prophage bIL286 protein 60                                         |
| <u>ps101</u> | X |     |     | 3.1  |      | 2.3  |      | prophage bIL310 protein 01                                                   |
| <u>ps105</u> | X |     |     | 2.8  | 3.7  |      |      | DNA primase prophage bIL310 protein 05                                       |
| <u>ps106</u> | X |     |     | 2.1  | 3.0  |      |      | prophage bIL310 protein 06                                                   |
| <u>ps107</u> | X |     |     | 2.4  | 2.2  | 2.8  | 2.0  | prophage bIL310 protein 07                                                   |
| <u>ps109</u> | X |     |     | 2.6  | 4.2  |      |      | prophage bIL310 protein 09                                                   |
| <u>ps115</u> | X |     |     |      |      | -2.2 |      | prophage bIL310 protein 15 transcription regulator                           |
| <u>ps116</u> | X |     |     | -3.5 | -3.0 |      | -2.3 | prophage bIL310 protein 16                                                   |
| <u>ps210</u> | X |     |     |      |      | 2.6  |      | prophage bIL312 protein 10                                                   |
| <u>ps211</u> | X |     |     |      | 2.3  |      |      | prophage bIL312 protein 11                                                   |
| <u>ps216</u> | X |     |     | 2.1  |      |      |      | prophage bIL312 protein 16                                                   |
| <u>ps303</u> | X | 3.2 | 2.4 |      |      |      |      | prophage bIL311 protein 03                                                   |
| <u>ps304</u> | X | 2.4 | 2.4 |      |      |      |      | prophage bIL311 protein 04                                                   |
| <u>ps305</u> | X | 2.2 |     |      |      |      |      | prophage bIL311 protein 05                                                   |
| <u>ps306</u> | X |     | 2.5 | 3.7  |      | 2.0  |      | prophage bIL311 protein 06                                                   |
| <u>ps311</u> | X |     |     |      |      | -4.0 |      | prophage bIL311 protein 11                                                   |
| <u>ps315</u> | X |     |     |      | -2.5 | -2.5 |      | prophage bIL311 protein 15                                                   |

GCF\_000838045.1
